# Supplementary material for: Contribution of buoyancy fluxes to tropical Pacific sea level variability
Source: Copernicus journal article supplement (doi:10.5194/os-2021-31), 2021-04-12
Supplement: Supplementary file [file os-2021-31-AC3-supplement.pdf]

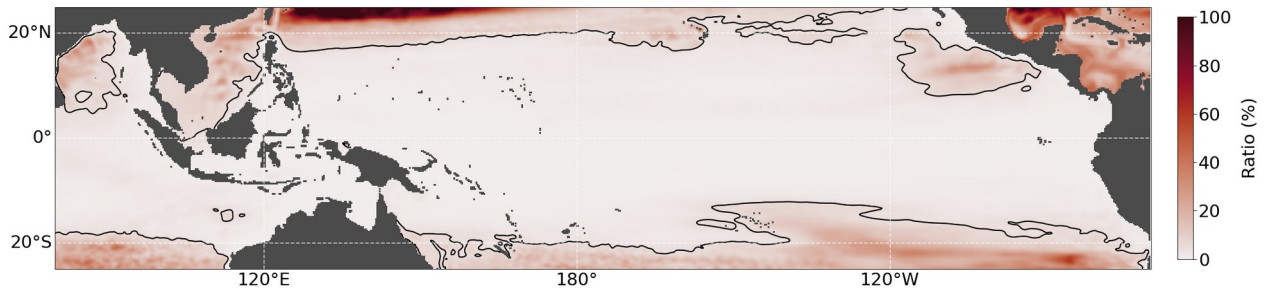

*Figure 3: Ratio of SSH variance from O025-RYF90 and O025-HC. Black contour lines marks 5% threshold. SDs are based on the period from 1958 to 2016. The global mean trends have been subtracted and all data was smoothed with a 12-month running mean window prior to calculation.*
